# Supplementary material for: Identification and Analysis of Muscle-Related Protein Isoforms Expressed in the White Muscle of the Mandarin Fish (Siniperca chuatsi)
Source: Springer Nature journal article supplement (doi:10.1007/s10126-010-9275-1), 2010-03-30
Supplement: MOESM1 [file 10126_2010_9275_MOESM1_ESM.doc]

5 15 25 35 45 55

MYL1_SC MAPKKDAKAP AKKAEPAPAP APAPEPAPAP AAAPAVDLSA VKVEFSADQI EDYREAFGLF

MLE1_MUGCA .P-----... .......... .......... -......... .......... ..........

MYL3_SC ---------- ---------- ---------- ---------- -MT....... ..FK......

MYL3b_SKr ---------- ---------- ---------- ---------- -MT....... ..FK......

MYL3_SKr ---------- ---------- ---------- ---------- -MT....... ..FK......

MLE3_MUGCA ---------- ---------- ---------- ---------- --T....... ..FK......

MYL4_SC

MYL6_RAT ---------- ---------- ---------- ---------- -MCD.TE..T AEFK...Q..

EF-hand I

65 75 85 95 105 115

MYL1_SC DRVGDSKVAY NQIADIMRAL GQNPTNKEVS RLLGNPSNDD MANKRVEFEG FLPMLQTIIN

MLE1_MUGCA .....N.... .......... .......... K......A.. .T.......A ..........

MYL3_SC ......Q..F ..V....... .......D.V KI....TA.. .V...LN.DA .....KQVDA

MYL3b_SKr ......Q..F ..V....... .......D.V KI....TA.. .V...LN.DA .....KQVDA

MYL3_SKr ......Q..F ..V....... .......D.V KI....TA.. .V...LN.DA .....KQVDA

MLE3_MUGCA ..I...Q..F ..V....... .......D.T KI.....A.. .....LN.DA .....KEVDA

MYL4_SC .... ....V.A..L KV....KAEE .NT.MLD..Q ....F.A.AK

MYL6_RAT ..T..G.IL. S.CG.V.... ......A..L KV....KS.E .NV.VLD..H .......VAK

EF-handII

125 135 145 155 165 175

MYL1_SC SPNKAQFEDY VEGLRVFDKE GNGTVMGAEL RIVLSTLGEK MTEPEIDALM AGQEDENGCV

MLE1_MUGCA .....G.... .......... .......... .......... ...A...... ........V.

MYL3_SC L.-.GTYD.. .......... .......... .......... ......E... ........S.

MYL3b_SKr L.-.GTYD.. .......... .......... CR..Y..... ......E... ........S.

MYL3_SKr I.-.GTYD.. .......... .......... .......... ......E... ........S.

MLE3_MUGCA L.-.GTYD.. .......... .......... .......... .......... ......-.S.

MYL4_SC NKDQGSM..F .......... .......... .H..T..... .S.E.VET.L ..H..A...I

MYL6_RAT NKDQGTY... .......... .........I .H..V..... ...E.VEM.V ..H..S...I

185

MYL1_SC NYEAFVKHIM SV

MLE1_MUGCA .......... ..

MYL3_SC H......... ..

MYL3b_SKr H......... ..

MYL3_SKr H......... ..

MLE3_MUGCA H......... ..

MYL4_SC ...EL.RMV. NG

MYL6_RAT ...ELLRMVL NG

**Figure 1A. Alignment of mandrin fish *Siniperca chuatsi* major myosin light chains (MYLs) with other MYLs.**

The abbreviation and Swiss-Prot accession number for the MYLs sequences aligned are:

MYL1_SC, MYL3_SC, mandrin fish *Siniperca chuatsi* Skeletal muscles MYLs; MYL3_SKr, MYL3b_SKr,mandrin fish *Siniperca knerii* Skeletal muscles MYLs sequenced in database. MLE1_MUGCA, Liza ramada *Liza ramado* Myosin light chain 1, skeletal muscle isoform (P82159.1); MLE3_MUGCA, Liza ramada *Liza ramado* Myosin light chain 3, skeletal muscle isoform (P82160); MYL6_RAT, Norway rat *Rattus norvegicus* Myosin light polypeptide 6, (Q64119). Dot indicates identity with the top sequence; Dash indicates a gap inserted for spacing purposes.

5 15 25 35 45 55

MYL2_SKr MAPKKAKRRQ AAGDSG--SS NVFSMFEQSQ IQEYKEAFTI IDQNRDGIIS KDDLRDVLAS

MYL2_SC .......... ......--.. .......... .......... .......... ..........

MLRS_RAT .........- ..AEG---.. ......D.T. ...F.....V .........D .E....TF.A

MLRT_RABIT .........- ..AEG.--.. ......D.T. ...F.....V .........D .E....TF.A

MYL5_SC .SS.R..GKT TKKRPQRAT. ...A..D... ...F....NM .......FVD .E..H.M...

MYL9_PONAB .SS.R..AKT TKKRPQRAT. ...A..D... ...F....NM .......F.D .E..H.M...

65 75 85 95 105 115

MYL2_SKr MGQLNTKNEE LEAMIKEASG PINFTVFLTM FGEKLKGADP EDVILSAFKV LNPEGTGTIK

MYL2_SC .......... .......... .......... .......... .......... .D........

MLRS_RAT ..R..V.... .D..M..... .......... .......... ....TG.... .D...K....

MLRT_RABIT ..R..V.... .D..M..... .......... .......... ....TG.... .D...K....

MYL5_SC L.K-.PAEDY ....ML..P. .....M.... ..GEAQWHR. ---------- ----------

MYL9_PONAB L.K-.PTD.Y ..G.MS..P. .....M.... .....N.T.. ....RN..AC FDE.AS.F.H

125 135 145 155 165

MYL2_SKr KQFLEELLTT QCDRFSKEEI KNMWAAFPPD VAGNVDYKNI CYVITHGEEK EE-

MYL2_SC ..-------- ---------- ---------- ---------- ---------- ---

MLRS_RAT .......... ......Q... .......... .G........ .......DA. DQE

MLRT_RABIT ........I. ......Q... .......S.. .G........ .......DA. DQE

MYL5_SC ---------- ---------- ---------- ---------- ---------- ---

MYL9_PONAB EDH.R..... MG...TD..V DE.YREA.I. KK..FN.VEF TRILK..AKD KDD

**Figure 1B:** **Alignment of mandrin fish *Siniperca chuatsi* putative MYLs with other’s MYLs.**

The abbreviation and Swiss-Prot accession number for the putative MYLs sequences aligned are:

MYL2_SC, mandrin fish *Siniperca chuatsi* Skeletal muscles MYLs; MYL2_SKr, MYL3b_SKr,mandrin fish *Siniperca knerii* Skeletal muscles MYLs sequenced in database. MLRS_RAT, Norway rat *Rattus norvegicus* Myosin regulatory light chain 2, skeletal muscle isoform (P04466); MLRT_RABIT, rabbit *Oryctolagus cuniculus* Myosin regulatory light chain 2, skeletal muscle isoform type 2 (P02608); MYL9_PONAB,Sumatran orangutan *Pongo abelii* Myosin regulatory light polypeptide 9 (Q5RBA4). Dot indicates identity with the top sequence; Dash indicates a gap inserted for spacing purposes.

5 15 25 35 45 55

MYHHead1_SC MSTDAEMEAY GPAAVYLRKP EKERIEAQAS PFDAKTAYFV VDADEMYLKG KLVKKEGGKA

MYHHead_SKr .......... .......... .......... .......... .......... ..........

MYH4_RAT ..S....AVF .E..P....S ........NK .....SSV.. ...K.S.V.A TVQSR....V

MYH4_MOUSE ..S....AVF .E..P....S ........NK .....SSV.. ...K.S.V.A TVQSR....V

MYH3_CHICK .A...D.AIF .E..P....S ........NK .....SSV.. .H.K.S.V.S TIQS..S..V

MYHHead3_SC

MYSS_CYPCA -MG.G...CF .........T .R......NT .......F.. ..P....... T..S......

MYHHead2_SC

65 75 85 95 105 115

MYHHead1_SC TVETDTGKTV TVKEEDIHPR NPPKYDKIED MVMMTHLNEP CVLYNLKERY ASWMIYTYSG

MYHHead_SKr .......... .......... .......... .......... .......... ..........

MYH4_RAT .AK.EG.A.. ....DQVFSM .......... .A.....H.. A......... .A........

MYH4_MOUSE .AK.EG.A.. ...DDQVFSM .......... .A.....H.. A......... .A........

MYH3_CHICK ..K.EG.E.L ....DQ.FSM .......... .A.....H.. A......... .A........

MYHHead3_SC

MYSS_CYPCA ..K.HS.... ....DE.F.M ....F..... .A........ A..F...... .A........

MYHHead2_SC

ATP-binding site I ATP-binding site II

125 135 145 155 165 175

MYHHead1_SC LFCVVVNPYK WLPVYDAVVV GAYRGKKRIE APPHIFSISD NAYQFMHTDR ENQSVLITGE

MYHHead_SKr .......... .......... .......... .......... .......... ..........

MYH4_RAT ....T..... .....NPE.. A.......Q. .......... ......L... ....I.....

MYH4_MOUSE ....T..... .....NPE.. A.......Q. .......... ......L... ....I.....

MYH3_CHICK ....T..... .....NPE.. L.......Q. .......... ......L... ....I.....

MYHHead3_SC .L... H...I.....

MYSS_CYPCA ....T..... .......... .G........ .......... ......L... ..........

MYHHead2_SC

Loop I (20-50kDa junction)

185 195 205 215 225 235

MYHHead1_SC SGAGKTVNTK RVIQYFATIA AIG-AKKAEP TPGKMQGSLE DQIVAANPLL EAYGNAKTVR

MYHHead_SKr .......... .......... ...-...... .......... .......... ..........

MYH4_RAT .......... .......... VT.DK..E.A PS.....T.. ...IS..... ..F.......

MYH4_MOUSE .......... .......... VT.DK..E.A .S.....T.. ...IS..... ..F.......

MYH3_CHICK .......... .......... .S.DK..E.Q PA.....T.. ...IS..... ..F.......

MYHHead3_SC .......... .........- .VAG...... AA..I..... ...I...... ..........

MYSS_CYPCA .......... ........VG .MSGP..P.. V......... .......... ..........

MYHHead2_SC

ATP-binding site III

245 255 265 275 285 295

MYHHead1_SC NDNSSRFGKF IRIHFGSTGK LASADIETYL LEKSRVTFQL SAERSYHIFY QLMTGHKPEL

MYHHead_SKr .......... .......... .......... .......... .......... ..........

MYH4_RAT .......... ......A... .......... .......... K......... .V.SNK....

MYH4_MOUSE .......... ......A... .......... .......... K......... .I.SNK....

MYH3_CHICK .......... ......A... .......... .......... K......... .I.SNK....

MYHHead3_SC .......... .K....T... .......... .......... .......... ..........

MYSS_CYPCA .......... ......T... .......... .......... .......... ..........

MYHHead2_SC

305 315 325 335 345 355

MYHHead1_SC LEALLITTNP YDYPMISQGE ITVKSINDVE EFIATDTAID ILGFTAEEKM GIYKLTGAVM

MYHHead_SKr .......... .......... .......... .......... .......... ..........

MYH4_RAT I.M....... ..FAYV.... ...P..D.Q. .LM.....V. ......D..V A.........

MYH4_MOUSE I.M....... ..FAYV.... ...P..D.Q. .LM.....V. ....S.D..V A.........

MYH3_CHICK I.M....... ...QYV.... ...P....Q. .LM...S... .....PD..T A.........

MYHHead3_SC .......... .......... .......... .......... .......... ..........

MYSS_CYPCA .......... .......... .......... .......... ......D..I S.........

MYHHead2_SC

Actin-binding site I

365 375 385 395 405 415

MYHHead1_SC HHGNMKFKQK QREEQAEPDG TEVADKISYL LGLNSADMLK YLCYPRVKVG NEMVTKGQTV

MYHHead_SKr .......... .......... .......... .......... .......... ..........

MYH4_RAT .Y........ .......... ......AA.. TS.....L.. A......... ..Y.......

MYH4_MOUSE .Y........ .......... ......AA.. TS.....L.. A......... ..Y.......

MYH3_CHICK .Y..L..... ........G. ......AA.. M......L.. A......... ..Y.......

MYHHead3_SC .......... .......... .......... .......... .......... ..........

MYSS_CYPCA .......... .......... .......A.. M......... A..F...... ..........

MYHHead2_SC

425 435 445 455 465 475

MYHHead1_SC PQVNNAVSAL CKSVYEKMFL WMVIRINEML DTKQARQFYI GVLDIAGFEI FDYNSLEQLC

MYHHead_SKr .......... .......... .......... .......... .......... ..........

MYH4_RAT Q..Y.S.G.. A.AM...... ...T...QQ. ....P..YF. .......... ..F.T.....

MYH4_MOUSE Q..Y.S.G.. A..M...... ...T...QQ. ....P..YF. .......... ..F.T.....

MYH3_CHICK Q..Y.S.G.. A...F..... ...V...QQ. ....P..YF. .......... ..F.......

MYHHead3_SC ...S...... ...I...... .......... ....P..... .......... ..F.......

MYSS_CYPCA .......... S......... .......... ....P...F. .......... ..F.......

MYHHead2_SC .....T... .......... .......... ..........

485 495 505 515 525 535

MYHHead1_SC INFTNEKLQQ FFNHHMFVLE QEEYKKEGIQ WEFIDFGMDL ASCIELIEKP MGIFSILEEE

MYHHead_SKr .......... .......... .......... .......... .......... ..........

MYH4_RAT .......... .......... .........E .......... .A........ ..........

MYH4_MOUSE .......... .......... .........D .......... .A........ ..........

MYH3_CHICK .......... .......... .........E .......... .A........ ..........

MYHHead3_SC .......... .......... .........E .......... .A........ ..........

MYSS_CYPCA .......... .......... .........E .......... .A........ ..........

MYHHead2_SC .......... .......... .......... .......... .......... ..........

Actin-binding site II Actin-binding site III

545 555 565 575 585 595

MYHHead1_SC CMFPKASDTT FKNKLHDQHL GKTKAFEKPK PGKGKAEAHF SLVHYAGTVD YNITGWLEKN

MYHHead_SKr .......... .......... .......... .......... .......... ..........

MYH4_RAT ......T..S .....YE... ..SNN.Q... .A........ .......... ...I...D..

MYH4_MOUSE ......T..S .....YE... ..SNN.Q... .A........ .......... ...I...D..

MYH3_CHICK ......T..S .....Y.... ..SNN.Q... .......... .......... ..........

MYHHead3_SC .......... .......... ....G..... .......... ......VS.. C..N.....

MYSS_CYPCA ......T..S .......... ...A..Q... .A........ .......... ...V...D..

MYHHead2_SC .......... .......... .......... .......... .......... ........N.

Loop II (50-20 kDa junction)

605 615 625 635 645 655

MYHHead1_SC KDPLNDSVVQ LYQKSSNKLL AFLYAS-HGA ADEAAASGKK GGKKKGGSFQ TVSAVFRENL

MYHHead_SKr .......... .......... ......-... .......... .......... ..........

MYH4_RAT .....ET..G .....GL.T. ...FSGGQA. EA.-GGG... ......S... ....L.....

MYH4_MOUSE .....ET..G .....GL.T. ...FSGGQA. EA.-GGG... ......S... ....L.....

MYH3_CHICK .....ET..G ......L.T. .L.F..VG.. EA.SG.G... ......S... ....L.....

MYHHead3_SC

MYSS_CYPCA .......... ......L.V. .....T-... EA.--GG.G. K......... ....L.....

MYHHead2_SC .H..

665 675 685 695 705 715

MYHHead1_SC GKLMTNLRST HPHFVRCLIP NESKTPGLME NFLVIHQLRC NGVLEGIRIC RKGFPSRILY

MYHHead_SKr .......... .......... .......... .......... .......... ..........

MYH4_RAT N......K.. .......... ..T....A.. HE..L..... .......... ..........

MYH4_MOUSE N......K.. .......... ..T....A.. HE..L..... .......... ..........

MYH3_CHICK N...S..... .......... ..T....A.. HE..L..... .......... .....I....

MYHHead3_SC

MYSS_CYPCA .......... .......... .......... .Y........ .......... ..........

MYHHead2_SC

725 735 745 755 765 775

MYHHead1_SC GDFKQRYKVL NASVIPEGQF MDNKKASEKL LGSIDVDHTQ YMFGHTKVFF KAGLLGALEE

MYHHead_SKr .......... .......... .......... .......... .......... ..........

MYH4_RAT A......... ...A...... I.S....... .....I.... .K........ ......T...

MYH4_MOUSE A......... ...A...... I.S....... .....I.... .K........ ......T...

MYH3_CHICK A......... ...A...... I.S....... .......... .K........ ......L...

MYHHead3_SC

MYSS_CYPCA .......... .......... I......... .......... .K........ ..........

MYHHead2_SC

MYL-binding site MYL-binding site

785 795 805 815 825 835

MYHHead1_SC MRDEKLAALV TMTQALCRGY VMRKEFVKMM ERRESIYSIQ YNIRSFMNVK NWPWLKLYFK

MYHHead_SKr .......... .......... .......... .......... .......... ..........

MYH4_RAT .......Q.I .R...V.... L..V..R... ......FC.. ..V.A..... H...M.....

MYH4_MOUSE .......Q.I .R...V.... L..V..K... ......FC.. ..V.A..... H...M.....

MYH3_CHICK .......Q.I .R...R...F L..V..K... ......FC.. ..V.A..... H...M..F..

MYHHead3_SC

MYSS_CYPCA .......L.. .......... .......... .......... .......... H...M.....

MYHHead2_SC

Last Pro

843

MYHHead1_SC IKP

MYHHead_SKr ...

MYH4_RAT ...

MYH4_MOUSE ...

MYH3_CHICK ...

MYHHead3_SC

MYSS_CYPCA ...

MYHHead2_SC

**Figure 2. Alignment of mandrin fish *Siniperca chuatsi* MYHs S1 fragment with other MYHs**

The abbreviation and Swiss-Prot accession number for the MYH sequences aligned are:

MYHHead1_SC, MYHHead2_SC, MYHHead3_SC, mandrin fish *Siniperca chuatsi* head domains of MYHs; MYHHead_SKs, mandrin fish *Siniperca* *knerii* head domains of MYHs in literature; MYH4_RAT, Norway rat *Rattus norvegicus*, Myosin heavy chain 2b (Q29RW1); MYH4_MOUSE, house mouse *Mus musculus* Myosin heavy chain 2b (Q5SX39); MYH3_CHICK, chicken *Gallus gallus* Myosin heavy chain, fast skeletal muscle, embryonic (P02565); MYSS_CYPCA, common carp *Cyprinus carpio* Myosin heavy chain, fast skeletal muscle (Q90339). Dot indicates identity with the top sequence; Dash indicates a gap inserted for spacing purposes. The ATP and actin binding regions, the loop regions, the light chain binding regions and the `last proline' at the Head-rod junction are labelled.

5 15 25 35 45 55

MYHTail_SKr PLLKSAETEK ELSQMKENYD KMKTDLATAL AKKKELEEKM VSLLQEKNDL QLQVASEVEN

MYSS_CYPCA PLLKSAETEK EMAAMKENYE KMKEDLTKAL AKKKELEEKM VSLLQEKNDL QLQVTAESEN

MYH4_RAT PLLKSAETEK EMATMKEDFE KAKEDLAKSE AKRKELEEKM VALMQEKNDL QLQVQAEADG

MYH4_MOUSE PLLKSAETEK EMANMKEDFE KAKEDLAKSE AKRKELEEKM VALMQEKNDL QLQVQAEADG

MYH3_CHICK PLLKSAESEK EMANMKEEFE KTKEELAKSE AKRKELEEKM VSLLQEKNDL QLQVQAEADG

65 75 85 95 105 115

MYHTail_SKr LSDAEERCEG LIKSKIQLEA KLKETTERLE DEEEINAELT AKKRKLEDEC SELKKDIDDL

MYSS_CYPCA LSDAEERCEG LIKSKIQLEA KLKETNERLE DEEEINAELT AKKRKLEDEC SELKKDIDDL

MYH4_RAT LADAEERCDQ LIKTKIQLEA KIKELTERAE DEEEINAELT AKKRKLEDEC SELKKDIDDL

MYH4_MOUSE LADAEERCDQ LIKTKIQLEA KIKELTERAE DEEEINAELT AKKRKLEDEC SELKKDIDDL

MYH3_CHICK LADAEERCDQ LIKTKIQLEA KIKELTERAE DEEEMNAELT AKKRKLEDEC SELKKDIDDL

125 135 145 155 165 175

MYHTail_SKr ELTLAKVEKE KHATENKVKN LTEEMASQDE SIAKLTKEKK ALQEAHQQTL DDLQAEEDKV

MYSS_CYPCA ELTLAKVEKE KHATENKVKN LTEEMASQDE SIAKLTKEKK ALQEAHQQTL DDLQAEEDKV

MYH4_RAT ELTLAKVEKE KHATENKVKN LTEEMAGLDE NIVKLTKEKK ALQEAHQQTL DDLQAEEDKV

MYH4_MOUSE ELTLAKVEKE KHATENKVKN LTEEMAGLDE NIAKLTKEKK ALQEAHQQTL DDLQAEEDKV

MYH3_CHICK ELTLAKVEKE KHATENKVKN LTEEMAALDE TIAKLTKEKK ALQEAHQQTL DDLQAEEDKV

185 195 205 215 225 235

MYHTail_SKr NTLTKAKTKL EQQVDDLEGS LEQEKKLRMD LERAKRKLEG DLKLAQESIM DLENDKQQSD

MYSS_CYPCA NTLTKAKTKL EQQVDDLEGS LEQEKKLRMD LERAKRKLEG DLKLAQESIM DLENEKQQSD

MYH4_RAT NTLTKAKTKL EQQVDDLEGS LEQEKKLRMD LERAKRKLEG DLKLAQESTM DIENDKQQLD

MYH4_MOUSE NTLTKAKTKL EQQVDDLEGS LEQEKKLRMD LERAKRKLEG DLKLAQESTM DIENDKQQLD

MYH3_CHICK NTLTKAKTKL EQQVDDLEGS LEQEKKLRMD LERAKRKLEG DLKMTQESTM DLENDKQQLD

245 255 265 275 285 295

MYHTail_SKr EKIKKKEFET SQLLSKIEDE QSLGAQLQKK IKELQACIEE LEEEIEAERA ARAKVEKQRA

MYSS_CYPCA EKIKKKDFEI SQLLSKIEDE QSLGAQLQKK IKELQARIEE LEEEIEAERA ARAKVEKQRA

MYH4_RAT EKLKKKEFEM SNLQSKIEDE QALGMQLQKK IKELQARIEE LEEEIEAERA SRAKAEKQRS

MYH4_MOUSE EKLKKKEFEM SNLQSKIEDE QALGMQLQKK IKELQARIEE LEEEIEAERA SRAKAEKQRS

MYH3_CHICK EKLKKKDFEI SQIQSKIEDE QALGMQLQKK IKELQARIEE LEEEIEAERT SRAKAEKHRA

305 315 325 335 345 355

MYHTail1_SK MNKKR EAEFQKLRRD LEEATLQHEA TASALRKKQA

MYHTail_SKr DLSRELEEIS ERLEEAGGAT AAQIEMNKKR EAEFQKLRRD LEEATLQHEA TASALRKKQA

MYSS_CYPCA DLSRELEEIS ERLEEAGGAT AAQIEMNKKR EAEFQKMRRD LEESTLQHEA TAAALRKEQA

MYH4_RAT DLSRELEEIS ERLEEAGGAT SAQIEMNKKR EAEFQKMRRD LEEATLQHEA TAAALRKKHA

MYH4_MOUSE DLSRELEEIS ERLEEAGGAT SAQIEMNKKR EAEFQKMRRD LEEATLQHEA TAAALRKKHA

MYH3_CHICK DLSRELEEIS ERLEEAGGAT AAQIDMNKKR EAEFQKMRRD LEEATLQHEA TAAALRKKHA

365 375 385 395 405 415

MYHTail2_SC MCRTLEDQFS

MYHTail1_SC DSVAELGEQI DNLQRVKQKL EKEKSEYKME IDDLSSNMEA VAKAKGNLEK ..........

MYHTail_SKr DSVAELGEQI DNLQRVKQKL EKEKSEYKME IDDLSSNMEA VAKAKGNLEK ..........

MYSS_CYPCA DSVAELGEQI DNLQRVKQKL EKEKSEYKME IDDLTSNMEA VAKAKANLEK ........L.

MYH4_RAT DSVAELGEQI DNLQRVKQKL EKEKSELKME IDDLASNMET VSKAKGNLEK ........L.

MYH4_MOUSE DSVAELGEQI DNLQRVKQKL EKEKSELKME IDDLASNMET VSKAKGNLEK ........L.

MYH3_CHICK DSTADVGEQI DNLQRVKQKL EKEKSELKME IDDLASNMES VSKAKANLEK ...S....L.

425 435 445 455 465 475

MYHTail2_SC ELKSKNDETV RQLNDINAQK ARLQTENGEY SRQLEEKEAL VSQLTRGKQA FTQQIEEFKR

MYHTail1_SC .......... .......... .......... .......... .......... ..........

MYHTail_SKr .......... .......... .......... .......... .......... ..........

MYSS_CYPCA .I.T.S..N. .....M...R .........F .......... .......... Y......L..

MYH4_RAT .V.T.EE.QQ .LI.ELS... ...H..S..F ....D..D.M ....S..... .......L..

MYH4_MOUSE .V.T.EE.QQ .LI.ELST.. ...H..S..F ....D..D.M ....S..... .......L..

MYH3_CHICK .I.T.EE.QQ .TI...S... ......S... ...V...D.. I...S..... .......L..

C-terminus of S2 region

485 495 505 515 525 535

MYHTail2_SC HVEEEVKAKN ALAHAVQSAR HDCDLLREQF EEEQEAKAEL QRGMSKANSE VAQWRSKYET

MYHTail1_SC .......... .......... .......... .......... .......... ..........

MYHTail_SKr .......... .......... ......T.N. .......... .......... ..........

MYSS_CYPCA .I........ .......... .........Y .......... .......... .....T....

MYH4_RAT QL...S.... .....L.... .........Y .......... ..A....... .....T....

MYH4_MOUSE QL...S.... .....L.... .........Y .......... ..A....... .....T....

MYH3_CHICK .L...I...K CP...L.... .........Y .......G.. ..AL...... .....T....

545 555 565 575 585 595

MYHTail2_SC DAIQRTEELE EAKKKLAQRL QDAEESIEAV NSKCASLEKT KQRLQGEVED LMIDVERANA

MYHTail1_SC .......... .......... .......... .......... .......... ..........

MYHTail_SKr .......... .......... .......... .......... .......... ..........

MYSS_CYPCA .......... .......... .......... .......... .......... .........S

MYH4_RAT .......... .......... .....HV... .......... .....N.... .......S..

MYH4_MOUSE .......... .......... .....HV... .......... .....N.... .......S..

MYH3_CHICK .......... .......... .....HV... .......... .....N.... .......S..

605 615 625 635 645 655

MYHTail2_SC LAANLDKKQR NFDKVLAEWK QKYEEGQAEL EGAQKEARSL STELFKMKNS YEESLDQLET

MYHTail1_SC .......... .......... .......... .......... .......... ..........

MYHTail_SKr .......... .......... .......... .......... .......... ..........

MYSS_CYPCA .......... .......... .....S.... .......... .......... ...A..H...

MYH4_RAT AC.A...... .......... .....T.... .AS...S... ......V..A ..........

MYH4_MOUSE AC.A...... .......... .....T.... .AS...S... ......V..A ..........

MYH3_CHICK AC.A.....K ....I.S... .....T.... .AS...S... .........A ......H...

665 675 685 695 705 715

MYHTail2_SC MKRENKNLQQ EISDLTEQIG ETGKSIHELE KAKKTVETEK TEIQSALEEA EGTLEHEEAK

MYHTail1_SC .......... .......... .......... .......... .......... ..........

MYHTail_SKr .......... .......... .......... .......... .......... ..........

MYSS_CYPCA L......... ........L. .......... .......S.. S...T..... ........S.

MYH4_RAT L......... .........A .G..H..... .I..QIDQ.. S.L.AS.... .AS.....G.

MYH4_MOUSE L......... .........A .G..H..... .I..QIDQ.. S.L.AS.... .AS.....G.

MYH3_CHICK L......... .........A .G..A..... .V..QI.Q.. S.L.T..... .AS.....G.

725 735 745 755 765 775

MYHTail2_SC ILRVQLELNQ IKGEVDRKLA EKDEEMEQIK RNSQRVMDSM QSALDSEVRS RNDALRVKKK

MYHTail1_SC .......... .......... .......... .......... .......... ..........

MYHTail_SKr .......... .......... .......... .......... .......... ..........

MYSS_CYPCA .......... V.S.I..... .......... ......I... ..T....... ..........

MYH4_RAT ...I...... V.S.I...I. .....ID.L. ..HL..VE.. ..T..A.I.. ......I...

MYH4_MOUSE ...I...... V.S.I...I. .....ID.L. ..HL..VE.. ..T..A.I.. ......I...

MYH3_CHICK .......... V.SDI...I. .....ID.L. ..HL..V... ..T..A.I.. ..E...L...

785 795 805 815 825 835

MYHTail2_SC MEGDLNEMEI QLSHANRQAA EAQKQLRNVQ GQLKDAQLHL DDAVRGQEDM KEQVAMVERR

MYHTail1_SC .......... .V........ .......... .......... .......... ..........

MYHTail_SKr .......... .......... .......... .......... .......... ..........

MYSS_CYPCA .......... .......... .......... .......... .E........ ..........

MYH4_RAT .......... ..N....... ..IRN...T. .M...T.... ...L...D.L ...L......

MYH4_MOUSE .......... ..N....... ..IRN...T. .M...T.... ...L...D.L ...L......

MYH3_CHICK .......I.. .......... ....N...T. .V...T.I.. ...L.S...L ..........

845 855 865 875 885 895

MYHTail2_SC NGLMLAEIEE LRVALEQTER GRKVAEQELV DASERVGLLH SQNTSLMNTK KKLEADLVQV

MYHTail1_SC .......... .......... .......... .......... .......... ..........

MYHTail_SKr .......... .......... .......... .......... .......... ..........

MYSS_CYPCA .S..Q..... ..A....... .......... .......... ......I... ..........

MYH4_RAT AN..Q..... ..AS...... S.R......L ......Q... T.....I... ....T.IS.I

MYH4_MOUSE AN..Q..... ..AS...... S.R......L ......Q... T.....I... ....T.IS.I

MYH3_CHICK AN.LQ..... ..A....... S........L ......Q... T.....I... ....S.IS.I

905 915 925 935 945 955

MYHTail2_SC QGEVEDSVQE ARNAEEKAKK AITDAAMMAE ELKKEQDTSS HLERMKKNLE VTVKDLQHRL

MYHTail1_SC .......... .......... .......... .......... .......... ..........

MYHTail_SKr .......... .......... .......... .......... .......... ..........

MYSS_CYPCA ....D.A... .......... .......... .........A .......... ..........

MYH4_RAT ...M..I... .......... .......... .........A ........M. Q.........

MYH4_MOUSE ...M..I... .......... .......... .........A ........M. Q.........

MYH3_CHICK .S.M..TI.. .......... .......... .........A .........D Q.........

965 975 985 995 1005 1015

MYHTail2_SC DEAENLAMKG GKKQLQKLES RVRELETEVD AEQRRGADAV KGVRKYERRV KELTYQ

MYHTail1_SC .......... .......... ......A... .......... .......... ......TEED

MYHTail_SKr .......... .......... ......A... .......... .......... ......TEED

MYSS_CYPCA ....S..... .......... ......A..E .......... .......... ......TEED

MYH4_RAT ....Q..L.. ....I....A ......N..E N..K.NIE.. ..L..H.... ......TEED

MYH4_MOUSE ....Q..L.. ....I....A ......N..E N..K.NIE.. ..L..H.... ......TEED

MYH3_CHICK ....Q..L.. ....I....A ......G... ...K.S.E.. .......... ......SEED

1025 1035 1045 1055 1065 1075

MYHTail1_SC KKNVVRLQDL VDKLQLKVKA YKRQAEEAEE QANTHMSRLR KVQHEMEEAQ ERADIAESQV

MYHTail_SKr KKNVVRLQDL VDKLQLKVKA YKRQAEEAEE QANTHMSRLR KVQHEMEEAQ ERADIAESQV

MYSS_CYPCA KKNVIRLQDL VDKLQLKVKV YKRQAEEAEE QTNTHLSRYR KVQHELEEAQ ERADVAESQV

MYH4_RAT RKNVLRLQDL VDKLQTKVKA YKRQAEEAEE QSNVNLAKFR KIQHELEEAE ERADIAESQV

MYH4_MOUSE RKNVLRLQDL VDKLQTKVKA YKRQAEEAEE QSNVNLAKFR KIQHELEEAE ERADIAESQV

MYH3_CHICK RKNVLRLQDL VDKLQMKVKS YKRQAEEAEE LSNVNLSKFR KIQHELEEAE ERADIAESQV

1085 1095

MYHTail1_SC NKLRVKSRDA GKTDIAE

MYHTail_SKr NKLRVKSRDA GKSESAE

MYSS_CYPCA NKLRAKSRDA GKSKDEE

MYH4_RAT NKLRVKSREV HTKVISEE

MYH4_MOUSE NKLRVKSREV HTKVISEE

MYH3_CHICK NKLRAKSREI GKKAESEE

**Figure 3.** **Alignment of mandrin fish *Siniperca chuatsi* MYH tail fragment with other MYHs**

The abbreviation and Swiss-Prot accession number for the MYH sequences aligned are:

MYH4_RAT, Norway rat *Rattus norvegicus*, Myosin heavy chain 2b (Q29RW1) ; MYH4_MOUSE, house mouse *Mus musculus* Myosin heavy chain 2b (Q5SX39); MYHTail1_SC, MYHTail2_SC, MYHTail3_SC, MYHTail4_SC,mandrin fish *Siniperca chuats* Tails of MYHs; MYH3_CHICK, chicken *Gallus gallus* Myosin heavy chain, fast skeletal muscle, embryonic (P02565); MYHTail_SKr, mandrin fish(*Siniperca knerii*) Tails of MYHs in literature; MYSS_CYPCA, common carp *Cyprinus carpio* Myosin heavy chain, fast skeletal muscle (Q90339). Dot indicates identity with the top sequence. C-terminus of S2 region was underlined. The numbering above the sequences (20, 40 etc) starts from the last Pro.

5 15 25 35 45 55

MYHTail1_SC MNKKR EAEFQKLRRD LEEATLQHEA TASALRKKQA DSVAELGEQI DNLQRVKQKL

MYHTail_SKr AAQIEMNKKR EAEFQKLRRD LEEATLQHEA TASALRKKQA DSVAELGEQI DNLQRVKQKL

65 75 85 95 105 115

MYHTail2_SC MCRTLEDQFS ELKSKNDETV RQLNDINAQK

MYHTail1_SC EKEKSEYKME IDDLSSNMEA VAKAKGNLEK .......... .......... ..........

MYHTail_SKr EKEKSEYKME IDDLSSNMEA VAKAKGNLEK .......... .......... ..........

125 135 145 155 165 175

MYHTail2_SC ARLQTENGEY SRQLEEKEAL VSQLTRGKQA FTQQIEEFKR HVEEEVKAKN ALAHAVQSAR

MYHTail1_SC .......... .......... .......... .......... .......... ..........

MYHTail_SKr .......... .......... .......... .......... .......... ..........

185 195 205 215 225 235

MYHTail2_SC HDCDLLREQF EEEQEAKAEL QRGMSKANSE VAQWRSKYET DAIQRTEELE EAKKKLAQRL

MYHTail1_SC .......... .......... .......... .......... .......... ..........

MYHTail_SKr ......T.N. .......... .......... .......... .......... ..........

245 255 265 275 285 295

MYHTail2_SC QDAEESIEAV NSKCASLEKT KQRLQGEVED LMIDVERANA LAANLDKKQR NFDKVLAEWK

MYHTail1_SC .......... .......... .......... .......... .......... ..........

MYHTail_SKr .......... .......... .......... .......... .......... ..........

MYHTail3_SC ......... .......... ..........

305 315 325 335 345 355

MYHTail2_SC QKYEEGQAEL EGAQKEARSL STELFKMKNS YEESLDQLET MKRENKNLQQ EISDLTEQIG

MYHTail1_SC .......... .......... .......... .......... .......... ..........

MYHTail_SKr .......... .......... .......... .......... .......... ..........

MYHTail3_SC .......... .......... ......I... .......... .......... ........L.

365 375 385 395 405 415

MYHTail2_SC ETGKSIHELE KAKKTVETEK TEIQSALEEA EGTLEHEEAK ILRVQLELNQ IKGEVDRKLA

MYHTail1_SC .......... .......... .......... .......... .......... ..........

MYHTail_SKr .......... .......... .......... .......... .......... ..........

MYHTail3_SC .......... .......... .......... .AS.....S. .......... ..........

425 435 445 455

MYHTail2_SC EKDEEMEQIK RNSQRVMDSM QSALDSEVRS RNDALRVKKK M

MYHTail1_SC .......... .......... .......... .......... .

MYHTail_SKr .......... .......... .......... .......... .

MYHTail3_SC .......... .......... .....A.... ........R. .

**Figure 4.** **Alignment of mandrin fish *Siniperca chuatsi* MYH tail fragments**

The abbreviation and Swiss-Prot accession number for the MYH sequences aligned are:

MYHTail1_SC, MYHTail2_SC, MYHTail3_SC,mandrin fish *Siniperca* *chuatsi* Tails of MYHs; MYHTail_SKr,mandrin fish *Siniperca knerii* Tails of MYHs. Dot indicates identity with the top sequence.

5 15 25 35 45 55

ACTS_ORYLA MCDDEETTAL VCDNGSGLVK AGFAGDDAPR AVFPSIVGRP RHQGVMVGMG QKDSYVGDEA

ACT1_SC ....D..... .......... .......... .......... .......... ..........

ACTB_XENTR .......... .......... .......... .......... .......... ..........

ACTS_RAT ...ED..... .......... .......... .......... .......... ..........

ACTB_SALSA --MED.IA.. .V.....MC. .......... .......... .......... ..........

ACT2_SC --MED.IA.. .V.....MC. .......... .......... .......... ..........

65 75 85 95 105 115

ACTS_ORYLA QSKRGILTLK YPIEHGIITN WDDMEKIWHH TFYNELRVAP EEHPTLLTEA PLNPKANREK

ACT1_SC .......... .......... .......... .......... .......... ..........

ACTB_XENTR .......... .......... .......... .......... .......... ..........

ACTS_RAT .......... .......... .......... .......... .......... ..........

ACTB_SALSA .......... .......V.. .......... .......... ....V..... ..........

ACT2_SC .......... .......V.. .......... .......... ....V..... ..........

125 135 145 155 165 175

ACTS_ORYLA MTQIMFETFN VPAMYVAIQA VLSLYASGRT TGIVLDAGDG VTHNVPVYEG YALPHAIMRL

ACT1_SC .......... .......... .......... .......... .......... ..........

ACTB_XENTR .......... .......... .......... ......S... ......I... ..........

ACTS_RAT .......... .......... .......... ......S... ......I... ..........

ACTB_SALSA .......... T......... .......... ....M.S... ...T..I... .......L..

ACT2_SC .......... T......... .......... ....M.S... ...T..I... .......L..

185 195 205 215 225 235

ACTS_ORYLA DLAGRDLTDY LMKILTERGY SFVTTAEREI VRDIKEKLCY VALDFENEMA TAASSSSLEK

ACT1_SC .......... .......... .......... .......... .......... ..........

ACTB_XENTR .......... .......... .......... .......... .......... ..........

ACTS_RAT .......... .......... .......... .......... .......... ..........

ACTB_SALSA .......... .......... ..T....... .......... ......Q..G ..........

ACT2_SC .....E.... ..

245 255 265 275 285 295

ACTS_ORYLA SYELPDGQVI TIGNERFRCP ETLFQPSFIG MESAGIHETA YNSIMKCDID IRKDLYANNV

ACT1_SC .......... .......... .......... .......... .......... ..........

ACTB_XENTR 　 .......... .......... .......... .........T .......... ..........

ACTS_RAT .......... .......... .......... .........T .......... ..........

ACTB_SALSA .......... .......... .A......L. ...C.....T ........V. ........T.

305 315 325 335 345 355

ACTS_ORYLA LSGGTTMYPG IADRMQKEIT ALAPSTMKIK IIAPPERKYS VWIGGSILAS LSTFQQMWIS

ACT1_SC　　　 .......... .......... .......... .......... .......... ..........

ACTB_XENTR　 .......... .......... .......... .......... .......... .........T

ACTS_RAT M......... .......... .......... .......... .......... .........T

ACTB_SALSA .......... .......... S......... .......... .......... ..........

365 375

ACTS_ORYLA KQEYDEAGPS IVHRKCF

ACT1_ SK　　　 .......... .......

ACTB_XENTR 　　.......... .......

ACTS_RAT .......... .......

ACTB_SALSA ......S... .......

**Figure 5. Alignment of mandrin fish *Siniperca chuatsi* actins with other actins**

The abbreviation and Swiss-Prot accession number for the actin sequences aligned are:

ACTS_ORYLA, Japanese medaka *Oryzias latipes* alpha skeletal muscle Alpha-actin-1 (Q98972.1); ACT1_SC, ACT2_SC,mandrin fish *Siniperca chuatsi* skeletal muscle actins; ACT2_XENTR, western clawed frog *Xenopus (Silurana) tropicalis* cytoplasmic actin 1(Q6NVA9.1) ; ACTS_RAT, Norway rat *Rattus norvegicus* alpha skeletal muscle Alpha-actin-1 (P68136.1); ACTB_SALSA, Atlantic salmon *Salmo salar* cytoplasmic actin 1 Beta-actin (O42161.1). Dot indicates identity with the top sequence; Dash indicates a gap inserted for spacing purposes. ATP binding site, gelsolin binding site and profilin binding were labeled with underlines,double-lines and boxes, respectively.

5 15 25 35 45 55

TPM1_SC MDAIKKKMQM LKLDKENALD RAEQAESDKK AAEDRSKQLE DDLVALQKKL KGTEDELDKY

TPM1_LIZAU .......... .......... .......... .S........ .......... ..........

TPM1_DANRE .......... .......... ......T... ...E...... .......... .A........

TPM1_RANTE .......... .......... ......A... G...K..... .E...M...M ..........

TPM1_XENLA .......... .......... ......A... G...K..... .E........ ..........

65 75 85 95 105 115

TPM1_SC SEALKDAQEK LELAEKKATD AEGDVASLNR RIQLVEEELD RAQERLATAL TKLEEAEKAA

TPM1_LIZAU .......... .......... .......... .......... .......... ..........

TPM1_DANRE .......... .......... .......... .......... .......... Q.........

TPM1_RANTE .......... .......... ..A....... .......... .......... Q.........

TPM1_XENLA .......... ...SD..... .......... .......... ......S... Q.........

125 135 145 155 165 175

TPM1_SC DESERGMKVI ENRAMKDEEK MELQEIQLKE AKHIAEEADR KYEEVARKLV IIEGDLERTE

TPM2_SC ........ .......... .......... ..........

TPM1_LIZAU .......... .......... .......... .......... .......... ..........

TPM1_DANRE .......... ....L..... .......... .......... .......... .V..E.....

TPM1_RANTE .......... ....L..... I......... .......... .......... ........A.

TPM1_XENLA .......... ....L..... .......... .......... .......... ........A.

TPM3_SC .... X...T..... ..I..M.... .......... .......... .L......S.

185 195 205 215 225 235

TPM1_SC ERAELSEGKC SELEEELKTV TNNLKSLEAQ AEKYSQKEDK YEEEIKVLTD KLKEAETRAE

TPM2_SC .......... .......... .......... .......... .......... ..........

TPM1_LIZAU .......S.. .......... .......... .......... .......... ..........

TPM1_DANRE .....N.... .......... ...M...... .....A.... .......... ..........

TPM1_RANTE .......S.. A......... .......... .......... .......... ..........

TPM1_XENLA .......S.. A......... .......... .......... .......... ..........

TPM3_SC ....VA.A.S GD......N. .......... .......... .....X.... ..........

245 255 265 275

TPM1_SC FAERSVAKLE KTIDDLEDEL YAQKLKYKAI SEELDHALND MTSI

TPM2_SC .......... .......... .......... .......... ...M

TPM1_LIZAU .......... .......... .......... .......... ....

TPM1_DANRE .......... .......... .......... .......... ....

TPM1_RANTE ....T..... .S........ .......... .......... ....

TPM1_XENLA ....T..... .S........ .......... .......... ....

TPM3_SC .......... ........

**Figure 6: Alignment of mandrin fish *Siniperca chuatsi* tropomyosins (TPMs) with other TPMs**

The abbreviation and Swiss-Prot accession number for the TPMs sequences aligned are:

TPM1_SC, TPM2_SC, TPM3_SC,mandrin fish *Siniperca* *chuatsi* tropomyosin; TPM1_LIZAU, golden grey mullet *Liza aurata*, tropomyosin alpha-1 chain (P84335.1); TPM1_DANRE, zebrafish *Danio rerio* tropomyosin alpha-1 chain (P13104); TPM1_RANTE, common frog *Rana temporaria* tropomyosin alpha-1 chain (P13105); TPM1_XENLA, African clawed frog *Xenopus laevis* tropomyosin alpha-1 chain (Q01173). Dot indicates identity with the top sequence.

**Glu-rich region**

5 15 25 35 45 55

TNNT3_HUMAN MSD-EEVEQV --EEQYEEEE EAQEEAAEVH EEVHEPEEVQ EDTAEEDAE- ----------

TNNT3_RAT ...-..T... --........ .....--..Q ..AP...... .--------- ----------

TNNT3_COTJA ...T....HG --..E..... .V...--... .PAPP..--- ---------- ----------

TNNT2_SC ...T...GVE AV..EVV..V .VAP...PEP .PEP...PEP .PVV.PEP.P EPEPEPEPEL

TNNT1_SC ...T...GVE ---------- ---------- ---------- ---------- ----------

65 75 85 95 105 115

TNNT3_HUMAN -EEKPRPKLT APKIPEGEKV DFDDIQKKRQ NKDLMELQAL IDSHFEARKK EEEELVALKE

TNNT3_RAT -......... .......... .......... .......... .......... .....I....

TNNT3_COTJA --....I... .......... .......... ....I..... ........R. ..........

TNNT2_SC E....KF.PS .....D.... .......... ....V...G. ..A...C... ...D.I...D

TNNT1_SC -....KF.PS .....D.... .......... ....V...G. ..A...C... .....I...D

125 135 145 155 165 175

TNNT3_HUMAN RIEKRRAERA EQQRIRAEKE RERQNRLAEE KARREEEDAK RRAEDDLKKK KALSSMGANY

TNNT3_RAT .......... .......... .......... .......... .......... ..........

TNNT3_COTJA .......... .......... K...A..... .......... .K........ ........S.

TNNT2_SC .......... ....V..... K...I.RE.. RRQ...I... KK.DXEA... S......S..

TNNT1_SC .......... ....V..... K...I.RE.. RRQ...I... KK.DEEA... S......S..

185 195 205 215 225 235

TNNT3_HUMAN SSYLAKADQK RG-KKQTARE MKKKILAERR KPLNIDHLGE DKLRDKAKEL WETLHQLEID

TNNT3_RAT .......... ..-....... .......... ........SD .......... .D..Y...T.

TNNT3_COTJA .......... ..-....... T...V..... ........N. .......... .DW.Y..QTE

TNNT2_SC ..H.QR..

TNNT1_SC ..H.QR.... ..G..E.E.. K......A.. .Q......N. ...K..IN.. H.WMT...SE

245 255 265 275 285

TNNT3_HUMAN KFEFGEKLKR QKYDITTLRS RIDQAQKHSK KAGTPAKGKV GGRWK

TNNT3_RAT .......... .......... .......... ...AT..... .....

TNNT3_COTJA .YD.T.QI.. K..E.L...C .LQELS.F.. ...--..... .....

TNNT1_SC ..DHM.R... ...EV....K .VEELS.F.. .GAAARRR.

**Figure 7. Alignment of mandrin fish *Siniperca chuatsi* troponin T with other troponin T**

The abbreviation and Swiss-Prot accession number for the TnTs sequences aligned are:

TNNT3_HUMAN, human *Homo sapiens* Fast skeletal muscle troponin T (P45378); TNNT3_RAT, Norway rat *Rattus norvegicus* fast skeletal muscle troponin T (P09739); TNNT1_SC, TNNT2_SC,mandrin fish *Siniperca chuatsi* troponin T isoform1 and 2; TNNT3_COTJA, Japanese quail *Coturnix coturnix japonica* fast skeletal muscle troponin T isoforms (P06398). Dot indicates identity with the top sequence; Dash indicates a gap inserted for spacing purposes. Glu-rich region is underlined.

TNNI1_SC ------MSDK KMSTSRKHHL KSLMLQIAAN WIQQEKKDIA AAKQAYMAEN CPAPSLSG-D

TNNI2_SC ---------- ---------- ---.V..... .......... .......V.. ........-E

TNNI3_SC .. ........-E

TNNI2_RABIT MGD--EEKRN RAI.A.RQ.. ..V......T ELEK.EGRRE .E..N.L..H ..PL..P.-S

TNNI2_COTJA MSD--EEKKR RAA.A.RQ.. ..A...L.VT E.EK.AAAKE VE..N.L..H ..PL..P.-S

TNNI4_SC MPEHVQERKP .I.A...LM. ....VAK.KE ELE..VLVKE EE..K.L..R A.PLNT.SLS

TNNI1_HUMAN MPE--VERKP .ITA...LL. .....AK.KE CWE..HEERE .E.VR.L..R I.TLQTR.LS

minimal/main inhibitory peptide region

65 75 85 95 105 115

TNNI1_SC QAALMETCRK LHALIDKVDE ERYDLEAKVG KADKEIEDLK IKVVDLAG-V KKPALKKVRM

TNNI2_SC .......... V......... .......... .G........ ........-. ........G.

TNNI3_SC .......... .......... .......... .......... ........-. ..........

TNNI2_RABIT M.EVQ.L.KQ ...K..AAE. .K..M.I..Q .SS..L..MN Q.LF..R.KF .R.P.RR...

TNNI2_COTJA MQE.Q.L.K. ...K..S... ....T.V.LQ .TN..L...S Q.LF..R.KF .R.P.RR...

TNNI4_SC L.Q.QDL..E ..VK..V... ....I....M LNTR..K..N ...L..R.KF .R.N.RR..V

TNNI1_HUMAN LS..QDL..E ...KVEV... ....I...CL HNTR..K... L..M..R.KF .R.P.RR..V

125 135 145 155 165 175

TNNI1_SC SADAMLKALL GSKHTVNMDL RANLKQVKKE --VKEEPAEA VGDWRKNIED KA---DRKKM

TNNI2_SC .......G.V .......... .......... --........ ..E.G..... ..---.....

TNNI3_SC .......... .......... .......... --........ .......... ..---.....

TNNI2_RABIT .......... ....K.C... .......... DTE..RDLRD .........E .SGMEG....

TNNI2_COTJA ......R... ....K..... .......... DTE..KDLRD .........E .SGMEG....

TNNI4_SC ....I.RS.. ....K.S... .....S.... DTE.KR.VK- DS.....V.A MSGMEG

TNNI1_HUMAN ......R... ....K.S... .....S.... DTE..R.V.- .......V.A MSGMEG....

185

TNNI1_SC FETA------

TNNI2_SC ....

TNNI3_SC ....

TNNI2_RABIT ..S-ES----

TNNI2_COTJA ..AGES----

TNNI1_HUMAN .DA.KSPTSQ

**Figure 8. Alignment of mandrin fish *Siniperca chuatsi* troponins with other troponin I**

The abbreviation and Swiss-Prot accession number for the troponin I sequences aligned are:

TNNI1_SC, TNNI2_SC, TNNI3_SC, TNNI4_SC, mandrin fish *Siniperca chuatsi* troponin I; TNNI2_RABIT, rabbit *Oryctolagus cuniculus* troponin I, fast skeletal muscle (P02643); TNNI2_COTJA, Japanese quail *Coturnix japonica* troponin I, fast skeletal muscle (P68247); TNNI1_HUMAN, human *Homo sapiens* troponin I, fast skeletal muscle (P19237). Dot indicates identity with the top sequence; Dash indicates a gap inserted for spacing purposes. The minimal/main inhibitory peptide region is underlined.

5 15 25 35 45 55

TNNI4_SC MPEHVQERKP KISASRKLML KSLMVAKAKE ELEQEVLVKE EEKQKYLAER APPLNTSSLS

TNNI1_HUMAN ...--V.... ..T.....L. ....L..... CW...HEER. A..VR..... I.T.Q.RG..

TNNI2_RABIT .GD--E.KRN RAITA.RQH. ..V.LQI.AT ...K.EGRR. A...N....H C...SLPG-.

TNNI2_COTJA .SD--E.K.R RAATA.RQH. ..A.LQL.VT .I.K.AAA.. V...N....H C...SLPG-.

minimal/main inhibitory peptide region

65 75 85 95 105 115

TNNI4_SC LAQLQDLCRE LHVKIDVVDE ERYDIEAKVM LNTREIKDLN IKVLDLRGKF KRPNLRRVRV

TNNI1_HUMAN .SA....... ..A.VE.... ........CL H........K L..M...... ...P......

TNNI2_RABIT M.EV.E..KQ ..A...AAE. .K..M.I..Q KSSK.LE.M. Q.LF...... ...P.....M

TNNI2_COTJA MQE..E..KK ..A...S... ....T.V.LQ KTNK.LE..S Q.LF...... ...P.....M

125 135 145 155 165 175

TNNI4_SC SADAILRSLL GSKHKVSMDL RANLKSVKKE DTEKKRPVK- DSDWRKNVEA MSGMEG

TNNI1_HUMAN ....M..A.. .......... .......... ....E...E- VG........ ......RKKM

TNNI2_RABIT ....M.KA.. ......C... .....Q.... ....E.DLRD VG.....I.E K.....RKKM

TNNI2_COTJA ....M..A.. ......N... .....Q.... ....EKDLRD VG.....I.E K.....RKKM

185

TNNI1_HUMAN FDAAKSPTSQ

TNNI2_RABIT FES-ES----

TNNI2_COTJA FEAGES----

**Figure 9. Alignment of mandrin fish *Siniperca chuatsi* TNNI4_SC with other troponin I**

The abbreviation and Swiss-Prot accession number for the troponin I sequences aligned are:

TNNI1_SC, TNNI2_SC, TNNI3_SC, TNNI4_SC, mandrin fish *Siniperca chuatsi* troponin I; TNNI2_RABIT, rabbit *Oryctolagus cuniculus* troponin I, fast skeletal muscle (P02643); TNNI2_COTJA, Japanese quail *Coturnix japonica* troponin I, fast skeletal muscle (P68247); TNNI1_HUMAN, human *Homo sapiens* troponin I, fast skeletal muscle (P19237). Dot indicates identity with the top sequence; Dash indicates a gap inserted for spacing purposes. The minimal/main inhibitory peptide region is underlined.

EF-hand I

5 15 25 35 45 55

TNNC1_SC --MTDAQQEA RSYLSEEMLA EFKAAFDMFD TDGGGDISTK ELGTVMRMLG QNPTREELDE

TNNC2_SC -MP....SD. ..F.T...I. .......... .......... .......... ...S.....A

TNNC2_ANGAN --P....TD. ..F.....I. .......... .......... .......... .........A

TNNC2_RANES AQP..Q.MD. ..F.....I. .......... .......... .......... .T..K....A

EF-hand II EF-hand III

65 75 85 95 105 115

TNNC1_SC IIEEVDEDGS GTIDFEEFLV MMVRLLKEDQ AGKSEEELAE CFRVFDKNGD GYIDREEFAL

TNNC2_SC .......... .......... ...QQ..... ........S. ...I...... .F......GE

TNNC2_ANGAN .......... .......... ....Q..... .......... F......... .F......GE

TNNC2_RANES .......... .......... ....QM...A Q......... ...I....A. ....S..LGE

EF-hand IV

125 135 145 155

TNNC1_SC IIRSTGEAIS EDEIDELMKD GDKNADGMLD FDEFLKMMEN VQ

TNNC2_SC .LHL...PVV .ED...MFGE S.S.K..KI. .......... ..

TNNC2_ANGAN .L..S..PV. .E......A. ....N..KI. ...W...... I.

TNNC2_RANES .L..S..S.T DE..E..... ....N..KI. .........G ..

**Figure 10. Alignment of mandrin fish *Siniperca chuatsi* troponin C with other troponin C**

The abbreviation and Swiss-Prot accession number for the troponin C sequences aligned are:

TNNC1_SC,TNNC2_SC, mandrin fish *Siniperca chuatsi* skeletal muscle troponin C; TNNC2_RANES, edible frog *Rana esculenta* skeletal muscle troponin C (P02589); TNNC2_ANGAN, European eel *Anguilla anguilla* skeletal muscle troponin C (P81660). Dot indicates identity with the top sequence; Dash indicates a gap inserted for spacing purposes. The four EF-hands were alternatively labeled with underlins and double lines. Ca2+ binding sites were labeled with red color.

Calcium binding region

5 15 25 35 45 55

PRV2_SC MAFAGVLTDA DITAALDGCK DAGTFDHKKF FKSCGMSGKS ADDVKKAFAI IDQDKSGFIE

PRVB_SCOJP ....S..K.. EV........ A..S...... ..A..L.... T.E....... ..........

PRV1_SC ..L..I.S.. ......AA.Q A.DS.K..E. .AKV.LTA.T P.EI....EV ..........

PRV4_SC ..L..I.S.. ......AV.Q A.DS.K..E. .AKV.LTA.T P.EI....EV ..........

PRVA_CYPCA ..YG.I.N.. ......EA.X AXDS.NA.S. .AKV.L.A.T P..I.....V ..........

PRV_HYPMO .....I.N.. ..A...EA.. A.DS.N..A. .AKV.L.A.. G......... ..........

PRV3_SC .......N.. EVK......A A.DS..Y... ..A..LAS.T .......... ....N.....

PRV_OREMO .......S.. .VK......A A.DS..Y.R. ..AS.LAA.T ........K. ....N.....

PRV5_SC ..MTDL.KAE E.KK...AF- A.E..NP... .EMV..KAM. .EN...V.QV L.V.G.....

PRV7_DANRE ..MKNL.K.D ..KK...QF. A.DS...... .DVV.LKAL. ..N..LV.KA L.V.A.....

EF-hand I EF-handII

Calcium binding region

65 75 85 95 105

PRV2_SC EDELKLFLQN FKAGARALTD AETATFLKAG DSDGDGKIGA DEFAAMVKA

PRVB_SCOJP .E........ ........S. ...KA..... .........I ......I.G

PRV1_SC .......... .S........ ...KV..... .........I ....V...G

PRV4_SC .......... .S........ ...KV..... .........I ....V...G

PRVA_CYPCA .......... .S........ ...KA..... .........V .....L...

PRV_HYPMO .......... .......... ...KI..... .........V .....L...

PRV3_SC .......... .S.T...... K..KA..A.. .........V .....L...

PRV_OREMO .E........ .S........ K..KA..S.. .........I .....L...

PRV5_SC .E...FV.KG .SKDG.D... ...KA..E.A .K.......I ...EGL.HE

PRV7_DANRE .E...FV.KG .S.DG.D... K..KA..A.A .K.......I ...E.L.HE

**Figure 11. Alignment of mandrin fish *Siniperca chuatsi* parvalbumins with other fish parvalbumins**

The abbreviation and Swiss-Prot accession number for the actin sequences aligned are:

PRV1_SC, PRV2_SC, PRV3_SC, PRV4_SC, PRV5_SC, PRV6_SC, mandrin fish *Siniperca* *chuatsi* parvalbumin isoforms; PRVB_SCOJP, chub mackarel *Scomber japonicus* parvalbumin beta (P59747); PRVA_CYPCA, common carp *Cyprinus carpio* parvalbumin alpha (P09227); PRV_HYPMO, silver carp *Hypophthalmichthys molitrix* parvalbumin (ACI95745.1); PRV7_DANRE, zebrafish *Danio rerio* parvalbumin-7 (Q804W2). Dot indicates identity with the top sequence; Dash indicates a gap inserted for spacing purposes. The EF-hand I and II were alternatively labeled with underlins and double lines. Ca2+ binding regions were labeled with red color.

Cytoplasmic domain Cation_ATPase_N domain

5 15 25 35 45 55

SERCa1_SC MENAHAKTPA ECLAYFGVNE NTGLTPDQFK KNLEKYGHNE LPAEEGKSIW ELIVEQFEDL

AT2A1_MAKNI .....T.S.. ...S...... H...S..... ...D.F.Y.. .......... D.........

SERCa2_SC .......... .......... .......... .......... .......... ..........

AT2A1_RANES ..Q..T..TE .......... ....SL..V. ..FD.F.P.. ........L. ..VA......

65 75 85 95 105 115

SERCa1_SC LVRILLLAAC ISFVLAWFEE GEETVTAFVE PLVILLILIA NAVVGVWQER NAEDAIEALK

AT2A1_MAKNI .......... .......... ....I..... .F........ ..I....... ..........

SERCa2_SC .......... .......... .......... .......... .......... ..........

AT2A1_RANES .........I .......... .......... .F........ .......... ..........

125 135 145 155 165 175

SERCa1_SC EYEPEMGKVY RSDRKSVQMI KA-------- ---------- ---------- ------QSIL

AT2A1_MAKNI .......... ........R. ..REIVPGDI VEVSVGDKVP ADIRIVSIKS TTLRVD....

SERCa2_SC .......... .......... ..REIVPGDI VEVSVGDKVP ADIRIVSIKS TTLRVD....

AT2A1_RANES .......... ........R. ..RELVPGDI VEVAVGDKVP ADIRLISIKS TTLRID....

185 195 205 215 225 235

SERCa1_SC TGESVSVIKH TESVPDLRAV NQDKKNMLFS GTNIAAGKAI GVAVATGVST EIGKIRDQMA

AT2A1_MAKNI .......... ......P... .......... .......... ...I...... ..........

SERCa2_SC .......... .......... .......... .......... .......... ..........

AT2A1_RANES .......... ..V...T... .......... ...VG....V ..VI...PN. .......E..

245 255 265 275 285 295

SERCa1_SC ATEQEKTPLQ AKLDEFGEQL SKVITLICIA VWAINIGHFN DPVHGGSWIR GAVYYFKIAV

AT2A1_MAKNI .......... .......... ....S...V. .......... .......... ..........

SERCa2_SC .......... .......... .......... .......... .......... ..........

AT2A1_RANES .......... Q......... ....S...V. ..L....... ..I......K ..I.......

305 315 325 335 345 355

SERCa1_SC ALAVAAIPEG LPAVITTCLA LGTRRMAKKN AIVRSLPSVE TLGCTSVICS DKTGTLTTNQ

AT2A1_MAKNI .......... .......... .......... .......... .......... ..........

SERCa2_SC .......... .......... .......... .......... .......... ...

AT2A1_RANES .......... .......... .......... .......... .......... ..........

365 375 385 395 405 415

SERCa1_SC MCVTKMFIIK SVDGDHVDLD AFDISGSKYT PEGEVSQGGA KTNCSAYDGL VELSTICALC

AT2A1_MAKNI ........V. .........N .......... ......H..S .......... ...A......

AT2A1_RANES .S.CR..V.D K.E..VTS.N E.T.T..T.A ...D.QKNDK NVKAGQ.... ...A......

425 435 445 455 465 475

SERCa1_SC NDSSLDYNET KKIYEKVGEA TETALSCLVE KMNVFNTNVK NLSRIERANA CCSVIKQLMK

AT2A1_MAKNI .........S .......... .....C.... ......S... .......... ..T.......

AT2A1_RANES ......F..S .GVF...... .....TT... .......D.. S..KV..... .N........

485 495 505 515 525 535

SERCa1_SC KNVTLEFSRD RKSMSVYCTP SKGD---GGA KMFVKGAPEG VIDRCTYVRV GTTRVPLTNA

AT2A1_MAKNI ..F....... .......... A...---... .......... .....A.... ........S.

AT2A1_RANES .EF....... ........I. A.ASRAAV.N .......... .....N.... ........S.

545 555 565 575 585 595

SERCa1_SC IKEKIMAVIR DWGTGRDTLR CLALATRDTP LKMEEMNLED STKFADYETD LTFVGCVGML

AT2A1_MAKNI .......... .......... .......... ..V....... .......... M.........

AT2A1_RANES ..D..LS.VK E......... .......... P.R.D.V.DE A.R.IE.... ..........

605 615 625 635 645 655

SERCa1_SC DPPRKEVTSS IQLCRDAGIR VIMITGDNKG TAIAICRRIG IFTEEEDVSG KAYTGREFDD

AT2A1_MAKNI ........G. .E........ .......... .......... ..K.D....N ..........

AT2A1_RANES .......MG. .....E.... .......... .......... ..G.DD.... R.F.......

665 675 685 695 705 715

SERCa1_SC LPLHEQAEAV RRACCFARVE PSHKSKIVEF LQGFDDITAM TGDGVNDAPA LKKAEIGIAM

AT2A1_MAKNI ..SQD..... .......... .......... ...N...... .......... ..........

AT2A1_RANES ..PA..R..C K..S...... .A........ ..S..E.... .......... ..........

725 735 745 755 765 775

SERCa1_SC GSGTAVAKSA SEMVLADDNF SSIVAAVEEG RAIYNNMKQF IRYLISSNVG EVVCIFLTAA

AT2A1_MAKNI .......... .......... .......... .......... .......... ..........

AT2A1_RANES ........T. .......... .T........ .......... .......... ..........

785 795 805 815 825 835

SERCa1_SC LGLPEALIPV QLLWVNLVTD GLPATALGFN PPDLDIMGKP PRSPKEPLIS GWLFFKYMAI

AT2A1_MAKNI .......... .......... .......... .......... .......... .....R....

AT2A1_RANES .......... .......... .......... .......DR. .......... .....R....

845 855 865 875 885 895

SERCa1_SC GGYVGAATVG GAVWWFLYDP TGPNVSYYQL SHFMQCHDEN EDFAGIDCEI FEACPPMTMA

AT2A1_MAKNI .......... ..A......S ...A.T.... .......NH. ...T.V..D. ...S......

AT2A1_RANES .......... A.A...M.AD D....TF... ......TED. P..E.HE... ..SPV.....

905 915 925 935 945 955

SERCa1_SC LSVLVTIEMC NALNSLSENQ SLLRMPPWSN FWLISAMTLS MSLHFMIIYV DPLPMIFKLT

AT2A1_MAKNI .......... .......... ..I....... L..MA..... .......... ..........

AT2A1_RANES .......... .......... ..I....... ...LGSIC.. .....L.L.. E.........

965 975 985 995

SERCa1_SC HLSVDQWMVV LKLSFPVIAI DEVLKFIARN YVEN-----

AT2A1_MAKNI ..TF...LM. F.......L. ......F... .I.TGKEVK

AT2A1_RANES P.N.E..FI. ..M.....LL ..L...V... .L.G-----

**Figure 12. Alignment of mandrin fish *Siniperca chuatsi* Sarcoplasmic/endoplasmic reticulum calcium ATPases (SERCas) with other SERCas**

The abbreviation and Swiss-Prot accession number for the actin sequences aligned are:

SERCa1_SC, SERCa2_SC, mandrin fish *Siniperca chuatsi* Skeletal muscles Sarcoplasmic/endoplasmic reticulum calcium ATPase 1; AT2A1_RANES, edible frog(*Rana esculenta*) Calcium-transporting ATPase sarcoplasmic reticulum type (Q92105); AT2A1_MAKNI, Atlantic blue marlin *Makaira nigricans* Sarcoplasmic/endoplasmic reticulum calcium ATPase 1, fast twitch skeletal muscle isoform (P70083.2). Dot indicates identity with the top sequence; Dash indicates a gap inserted for spacing purposes. Cytoplasmic domain and Cation_ATPase_N domain were alternatively labeled with underlines and double lines.

5 15 25 35 45 55

SERCa2_SC GGCTGCAGGA ATTCGAATTT CCAGCACTCT TGAATTGGAG GGTGCCACAC TTCTAGGGTG

SERCa1_SC .......... .........- .......... .......... .......... .......-..

65 75 85 95 105 115

SERCa2_SC CGGGTGGTGG ACCAAAGGTA AAAACTGCAG AGAACAACAA GAAGTAAAAG AGCGCGGATA

SERCa1_SC .......... .......... .......... .......... .......... ..........

125 135 145 155 165 175

SERCa2_SC GGTACGGTTA GACAGGAAAT CCCTTGTCTC TCCAGAAAGG ATGGAGAACG CACACGCAAA

SERCa1_SC .......... .......... .......... .......... .......... ..........

185 195 205 215 225 235

SERCa2_SC GACCCCGGCA GAATGCCTGG CTTACTTCGG GGTGAATGAG AACACCGGTC TCACTCCTGA

SERCa1_SC .......... .......... .......... .......... .......... ..........

245 255 265 275 285 295

SERCa2_SC CCAGTTCAAG AAGAACCTGG AAAAGTATGG CCACAATGAG CTGCCTGCTG AAGAGGGTAA

SERCa1_SC .......... .......... .......... .......... .......... ..........

305 315 325 335 345 355

SERCa2_SC GAGCATCTGG GAGCTGATCG TTGAGCAGTT CGAGGACTTG CTCGTCAGGA TCCTGCTGCT

SERCa1_SC .......... .......... .......... .......... .......... ..........

365 375 385 395 405 415

SERCa2_SC GGCTGCCTGC ATCTCTTTTG TGCTGGCCTG GTTCGAGGAA GGCGAGGAGA CTGTCACCGC

SERCa1_SC .......... .......... .......... .......... .......... ..........

425 435 445 455 465 475

SERCa2_SC CTTTGTGGAA CCCCTCGTCA TCCTTCTTAT CCTCATCGCT AATGCCGTTG TTGGAGTGTG

SERCa1_SC .......... .......... .......... .......... .......... ..........

485 495 505 515 525 535

SERCa2_SC GCAGGAGCGT AACGCTGAAG ATGCCATCGA GGCTCTCAAG GAGTATGAGC CTGAGATGGG

SERCa1_SC .......... .......... .......... .......... .......... ..........

545 555 565 575 585 595

SERCa2_SC CAAAGTTTAC CGCTCTGACA GAAAGAGTGT GCAGATGATC AAGGCCAGAG AAATTGTCCC

SERCa1_SC .......... .......... .......... .......... ........-- ----------

605 615 625 635 645 655

SERCa2_SC TGGAGACATT GTGGAGGTGT CAGTTGGTGA CAAAGTCCCC GCTGACATCA GGATTGTTTC

SERCa1_SC ---------- ---------- ---------- ---------- ---------- ----------

665 675 685 695 705 715

SERCa2_SC CATCAAGTCC ACCACCCTGC GTGTTGACCA GTCCATCCTT ACTGGTGAGT CTGTCAGTGT

SERCa1_SC ---------- ---------- ---------- -......... .......... ..........

725 735 745 755 765 775

SERCa2_SC GATCAAGCAC ACTGAGTCTG TTCCCGACCT CAGAGCTGTC AACCAGGACA AGAAGAACAT

SERCa1_SC .......... .......... .......... .......... .......... ..........

785 795 805 815 825 835

SERCa2_SC GCTTTTCTCT GGCACTAACA TCGCTGCTGG CAAGGCCATC GGTGTGGCTG TGGCCACCGG

SERCa1_SC .......... .......... .......... .......... .......... ..........

845 855 865 875 885 895

SERCa2_SC AGTCTCCACT GAGATTGGCA AGATCCGTGA TCAGATGGCT GCCACCGAGC AGGAGAAGAC

SERCa1_SC .......... .......... .......... .......... .......... ..........

905 915 925 935 945 955

SERCa2_SC TCCTCTGCAG GCAAAGCTGG ACGAGTTCGG CGAGCAGCTG TCCAAGGTTA TCACCTTGAT

SERCa1_SC .......... .......... .......... .......... .......... ..........

965 975 985 995 1005 1015

SERCa2_SC CTGTATTGCT GTCTGGGCCA TCAACATTGG CCACTTCAAC GACCCGGTCC ACGGAGGCTC

SERCa1_SC .......... .......... .......... .......... .......... ..........

1025 1035 1045 1055 1065 1075

SERCa2_SC ATGGATCCGC GGTGCTGTCT ACTACTTCAA GATCGCTGTC GCTCTGGCTG TGGCTGCCAT

SERCa1_SC .......... .......... .......... .......... .......... ..........

1085 1095 1105 1115 1125 1135

SERCa2_SC CCCTGAGGGT CTGCCCGCTG TCATCACCAC CTGCCTTGCC CTTGGTACCC GCCGTATGGC

SERCa1_SC .......... .......... .......... .......... .......... ..........

1145 1155 1165 1175 1185 1195

SERCa2_SC CAAGAAGAAC GCCATTGTCA GAAGCCTGCC CTCTGTGGAG ACCCTGGGCT GCACCTCCGT

SERCa1_SC .......... .......... .......... .......... .......... ..........

1205 1215 1225 1235 1245 1255

SERCa2_SC CATCTGCTCC GACAAGACT

SERCa1_SC .......... .........G GCACCCTTAC CACCAACCAG ATGTGTGTGA CCAAGATGTT

**Figure 13: Alignment of mandrin fish *Siniperca chuatsi* SERCa1_SC with SERCa1_SC cDNA sequences**

The abbreviation and Swiss-Prot accession number for the actin sequences aligned are:

SERCa1_SK, SERCa2_SK, mandrin fish *Siniperca chuatsi* Skeletal muscles Sarcoplasmic/endoplasmic reticulum calcium ATPase 1.
